# Supplementary material for: Comprehensive Profiling of Gene Expression in the Cerebral Cortex and Striatum of BTBRTF/ArtRbrc Mice Compared to C57BL/6J Mice
Source: Front Cell Neurosci. 2020 Dec 10;14:595607. doi: 10.3389/fncel.2020.595607 (PMC7758463; doi:10.3389/fncel.2020.595607)
Supplement: Supplementary file 4 [file Table_4.XLSX]

## Sheet: Contents
Supplementary Table S4. Kyoto Encyclopedia of Genes and Genomes (KEGG) pathways of differentially-expressed genes
Table S4A. KEGG pathways enriched in 1280 DEGs (p <0.05)
Table S4B. Selected pathways related to Neuron/synapse/receptor, Signaling, and Immune (p >0.05, yellow: p<0.05)

## Sheet: S4A
Table S4A. KEGG pathways enriched in 1280 DEGs (p <0.05)
Category	Term	Count	%	PValue	Genes	List Total	Pop Hits	Pop Total	Fold Enrichment	Bonferroni	Benjamini	FDR
KEGG_PATHWAY	mmu05203:Viral carcinogenesis	21	2.04678	0.000193963	HIST4H4, HPN, HIST1H4K, EGR2, HIST1H2BE, CREB1, CREB5, ACTN2, PMAIP1, HIST2H4, IRF9, CCND1, CDKN1B, CDKN2B, H2-BL, H2-T22, HIST1H4D, RBPJ, CCNA1, HIST1H4I, HIST1H4J	274	231	7691	2.55176	0.0471535	0.0471535	0.251525
KEGG_PATHWAY	mmu04921:Oxytocin signaling pathway	14	1.36452	0.00253126	PRKAG3, CACNA2D1, MYLK3, PPP1R12B, CACNB2, CACNG1, CACNA2D2, FOS, CD38, CCND1, CAMK2B, PLA2G4B, PLA2G4E, CAMK1D	274	150	7691	2.61981	0.467984	0.270606	3.23689
KEGG_PATHWAY	mmu04260:Cardiac muscle contraction	9	0.877193	0.00573806	FXYD2, CACNA2D1, COX7B2, COX6A2, COX7C, CACNB2, MYH7, CACNG1, CACNA2D2	274	77	7691	3.28083	0.761382	0.379749	7.19879
KEGG_PATHWAY	mmu00072:Synthesis and degradation of ketone bodies	4	0.389864	0.00590517	OXCT2B, HMGCLL1, HMGCS2, HMGCS1	274	11	7691	10.207	0.771163	0.308358	7.40108
KEGG_PATHWAY	mmu05034:Alcoholism	15	1.46199	0.0125367	HIST1H2AB, HIST1H2AC, HIST4H4, HIST1H4K, HIST1H2BE, CREB1, CREB5, FOSB, HIST2H4, GNG8, HIST1H4D, SLC18A1, HIST1H3F, HIST1H4I, HIST1H4J	274	202	7691	2.08436	0.956776	0.466488	15.108
KEGG_PATHWAY	mmu00280:Valine, leucine and isoleucine degradation	7	0.682261	0.0127668	OXCT2B, ALDH7A1, HMGCLL1, HMGCS2, IVD, HMGCS1, HIBCH	274	55	7691	3.57246	0.959214	0.413296	15.3645
KEGG_PATHWAY	mmu05322:Systemic lupus erythematosus	12	1.16959	0.0152712	HIST1H2AB, C1QB, HIST1H2AC, HIST4H4, HIST1H4K, HIST1H2BE, ACTN2, HIST1H4D, HIST1H3F, HIST1H4I, HIST1H4J, HIST2H4	274	147	7691	2.29137	0.978331	0.421554	18.1099
KEGG_PATHWAY	mmu04610:Complement and coagulation cascades	8	0.779727	0.01783	C1QB, CR2, CD59B, SERPINA1B, SERPINA1A, MASP2, SERPINA1C, SERPINA1E	274	76	7691	2.95467	0.988663	0.428771	20.8299
KEGG_PATHWAY	mmu04146:Peroxisome	8	0.779727	0.0275185	HACL1, HMGCLL1, NUDT19, AMACR, ABCD2, DDO, SOD2, ACOX3	274	83	7691	2.70548	0.99904	0.53792	30.3908
KEGG_PATHWAY	mmu05215:Prostate cancer	8	0.779727	0.0363038	CCND1, CDKN1B, PDGFB, CREB1, NKX3-1, CREB5, PDGFD, EGF	274	88	7691	2.55176	0.9999	0.601792	38.1273
KEGG_PATHWAY	mmu00590:Arachidonic acid metabolism	8	0.779727	0.0382594	CYP4A12B, GPX6, ALOX12B, LTA4H, CYP2E1, PLA2G4B, ALOX8, PLA2G4E	274	89	7691	2.52309	0.99994	0.586483	39.7378
KEGG_PATHWAY	mmu00564:Glycerophospholipid metabolism	8	0.779727	0.0490703	CDS2, AGPAT5, MBOAT7, MBOAT2, ETNK2, DGKH, PLA2G4B, PLA2G4E	274	94	7691	2.38888	0.999996	0.64797	47.9638
KEGG_PATHWAY	mmu05231:Choline metabolism in cancer	8	0.779727	0.0671867	FOS, PDGFB, SP1, DGKH, PDGFD, EGF, PLA2G4B, PLA2G4E	274	101	7691	2.22331	1	0.736092	59.463
KEGG_PATHWAY	mmu00650:Butanoate metabolism	4	0.389864	0.0691216	OXCT2B, HMGCLL1, HMGCS2, HMGCS1	274	27	7691	4.15842	1	0.72027	60.5412
KEGG_PATHWAY	mmu04110:Cell cycle	9	0.877193	0.0734094	CCND1, CDKN1B, CDKN2B, BUB1B, PKMYT1, ESPL1, PTTG1, CCNA1, ORC3	274	124	7691	2.03729	1	0.717942	62.8368
KEGG_PATHWAY	mmu04380:Osteoclast differentiation	9	0.877193	0.0789448	PIRB, IRF9, FOS, CYLD, NCF2, CREB1, MITF, FOSB, JUNB	274	126	7691	2.00495	1	0.721904	65.6182
KEGG_PATHWAY	mmu01100:Metabolic pathways	55	5.36062	0.0824102	SC5D, ALG1, ACOX3, CDS2, AGPAT5, GALNTL6, ALOX12B, BPNT1, PIGA, NMNAT3, HMGCLL1, FECH, GATM, PIGW, CYP2E1, ACADL, NME6, MAN2A2, CD38, ATP6V1C2, ALDH7A1, FOLH1, ADK, GAA, AOC3, ME3, ENPP1, COX7B2, COX7C, HMGCS1, EXTL1, CYP4A12B, IVD, ALDH1A3, B3GNT6, INPP5E, ETNK2, GCNT1, POLR3F, ACER2, AMACR, EPRS, DGKH, ADI1, HMGCS2, GLS, GFPT2, COX6A2, MBOAT2, LTA4H, IDI2, HIBCH, PLA2G4B, PLA2G4E, ALOX8	274	1269	7691	1.21656	1	0.716266	67.2603
KEGG_PATHWAY	mmu05031:Amphetamine addiction	6	0.584795	0.0886274	FOS, CREB1, CREB5, CAMK2B, FOSB, SLC18A1	274	67	7691	2.51367	1	0.723012	70.0262
KEGG_PATHWAY	mmu04512:ECM-receptor interaction	7	0.682261	0.0919922	COL2A1, SV2B, LAMC2, ITGA4, SDC4, SV2C, THBS4	274	88	7691	2.23279	1	0.717673	71.4315
KEGG_PATHWAY	mmu04530:Tight junction	7	0.682261	0.0998474	PARD3, CLDN9, MPDZ, MYH4, ACTN2, PATJ, MYH14	274	90	7691	2.18317	1	0.730079	74.479

## Sheet: S4B
Table S4B. Selected pathways related to Neuron/synapse/receptor, Signaling, and Immune (p >0.05, yellow: p<0.05)
Category	Term	Count	%	PValue	Genes	List Total	Pop Hits	Pop Total	Fold Enrichment	Bonferroni	Benjamini	FDR
KEGG_PATHWAY	mmu04921:Oxytocin signaling pathway	14	1.36452	0.00253126	PRKAG3, CACNA2D1, MYLK3, PPP1R12B, CACNB2, CACNG1, CACNA2D2, FOS, CD38, CCND1, CAMK2B, PLA2G4B, PLA2G4E, CAMK1D	274	150	7691	2.61981	0.467984	0.270606	3.23689
KEGG_PATHWAY	mmu04725:Cholinergic synapse	7	0.682261	0.21255	GNG8, FOS, CHRM3, CHRM2, CREB1, CREB5, CAMK2B	274	113	7691	1.73881	1	0.817316	95.5055
KEGG_PATHWAY	mmu04727:GABAergic synapse	5	0.487329	0.372912	GNG8, GABRG2, GABRA2, GABRG3, GLS	274	87	7691	1.61318	1	0.865132	99.7662
KEGG_PATHWAY	mmu04724:Glutamatergic synapse	6	0.584795	0.387525	GNG8, GRIK2, GRM7, GLS, PLA2G4B, PLA2G4E	274	115	7691	1.46449	1	0.869258	99.8279
KEGG_PATHWAY	mmu04726:Serotonergic synapse	6	0.584795	0.506061	GNG8, ALOX12B, SLC18A1, PLA2G4B, ALOX8, PLA2G4E	274	132	7691	1.27588	1	0.909816	99.9895
KEGG_PATHWAY	mmu04728:Dopaminergic synapse	6	0.584795	0.519481	GNG8, FOS, CREB1, CREB5, CAMK2B, SLC18A1	274	134	7691	1.25684	1	0.912244	99.9926
KEGG_PATHWAY	mmu04080:Neuroactive ligand-receptor interaction	11	1.07212	0.561618	HCRTR1, GABRG2, GABRA2, PARD3, GABRG3, CHRM3, LTB4R1, CHRM2, SSTR1, GRIK2, GRM7	274	285	7691	1.08338	1	0.913234	99.9978
KEGG_PATHWAY	mmu04721:Synaptic vesicle cycle	2	0.194932	0.894586	ATP6V1C2, SLC18A1	274	62	7691	0.905463	1	0.976121	100
KEGG_PATHWAY	mmu04360:Axon guidance	3	0.292398	0.947083	PAK6, ABLIM2, SEMA3A	274	129	7691	0.652775	1	0.988776	100
KEGG_PATHWAY	mmu04722:Neurotrophin signaling pathway	2	0.194932	0.988262	CAMK2B, KIDINS220	274	122	7691	0.460153	1	0.998335	100
KEGG_PATHWAY	mmu04740:Olfactory transduction	6	0.584795	1	OLFR1466, OLFR704, OLFR1500, OLFR1036, CAMK2B, OLFR750	274	1080	7691	0.155941	1	1	100
KEGG_PATHWAY	mmu04330:Notch signaling pathway	4	0.389864	0.251634	NOTCH1, APH1C, ADAM17, RBPJ	274	49	7691	2.29137	1	0.82066	97.6791
KEGG_PATHWAY	mmu04310:Wnt signaling pathway	5	0.487329	0.743315	CCND1, CAMK2B, DAAM1, FBXW11, WNT8B	274	141	7691	0.995367	1	0.950044	100
KEGG_PATHWAY	mmu04668:TNF signaling pathway	7	0.682261	0.190359	FOS, TNFRSF1B, CREB1, CREB5, GM5431, IL15, JUNB	274	109	7691	1.80262	1	0.806626	93.5527
KEGG_PATHWAY	mmu04062:Chemokine signaling pathway	10	0.974659	0.259332	CCL24, GNG8, PARD3, CCL3, PPBP, HCK, CX3CR1, CCL21A, CCL19, CCL17	274	196	7691	1.43211	1	0.824195	97.9707
KEGG_PATHWAY	mmu04630:Jak-STAT signaling pathway	5	0.487329	0.762792	IRF9, CCND1, IL12RB1, IL22RA1, IL15	274	145	7691	0.967908	1	0.953211	100
KEGG_PATHWAY	mmu04064:NF-kappa B signaling pathway	2	0.194932	0.970642	CCL21A, CCL19	274	97	7691	0.578749	1	0.994474	100
KEGG_PATHWAY	mmu04620:Toll-like receptor signaling pathway	2	0.194932	0.974642	FOS, CCL3	274	101	7691	0.555829	1	0.995256	100
